# Supplementary material for: An enantioselective double Diels–Alder approach to the tetracyclic framework of colombiasin A
Source: Royal Society of Chemistry journal article supplement (doi:10.1039/b302522e), 2003-01-01
Supplement: b302522e.doc [file b302522e.doc]

**Supporting Information**

**for**

An enantioselective double Diels-Alder approach to the tetracyclic framework of colombiasin A

Jason H. Chaplin,Alison J. Edwards and Bernard L. Flynn

Melting points were recorded with a Kofler hot-stage apparatus and are uncorrected. Proton (1H) and carbon (13C) NMR spectra were recorded with a Varian Gemini 300 spectrometer operating at 300 MHz for proton and 75 MHz for carbon, unless otherwise stated. All NMR spectra were recorded in (D)chloroform (CDCl3) at 20 °C. The protonicities of the carbon atoms observed in the carbon NMR were determined using attached proton test (APT) experiments. Infrared spectra (IR) were obtained as KBr discs or as films on KBr plates and were recorded on a Perkin-Elmer *Spectrum One* Fourier-transform infrared spectrophotometer. Low-resolution electron impact mass spectra (MS) were recorded at 70 eV on either a VG micromass 7070F instrument or a JEOL AX-505H mass spectrometer, unless otherwise stated. High-resolution mass spectra (HRMS) were recorded on a VG micromass 7070F instrument. Tetrahydrofuran (THF) was distilled under nitrogen from sodium benzophenone ketyl. Dichloromethane was distilled from calcium hydride. All experiments were performed under an anhydrous atmosphere of N2 (g) except as indicated. Flash chromatography was performed on Merck Kieselgel 60 unless otherwise stated.

**(3*E*, 7*E*)-deca-3,7-diene-2,9-dione (3)**

This compound **3** was prepared from 2,5-dimethoxytetrahydrofuran using previously described methods (reference [8] main text).

**(3*E*, 7*E*)-2,9-dimethyldeca-1,3,7,9-tetraene (4)**

To a stirred suspension of dry methyltriphenylphosphonium bromide (5.50 g, 15.4 mmol, dried under vacuum at 110C for 3 hours) in dry THF (20 ml) at 0C was added *n-*BuLi (15.4 mmol) and the resulting red suspension was allowed to warm to room temperature. Stirring was continued until no visible unreacted phosphonium salt remained, at which point the solution was cooled to -78C and a THF solution (5 ml) of dienone **3** (1.16 g, 7.00 mmol) was added. The reaction was allowed to warm slowly to room temperature, concentrated *in vacuo* and the residue washed with hexanes and filtered to remove the bulk of the triphenylphosphine oxide by-product. The filtrate was evaporated onto silica-gel (~1 g) and chromatographed (silica gel, hexanes) to give the diene **4** as a colourless oil (500 mg, 44% yield). 1H-NMR (300 MHz, CDCl3): 6.19 (d, *J* = 15.6 Hz, 2H), 5.69 (mc, 2H), 4.90 (s, 4H), 2.24 (mc, 4H), 1.85 (d, *J* = 1.2 Hz, 6H). 13C-NMR + APT (75 MHz, CDCl3): 142.0 (2 x C), 133.2 (2 x CH), 129.8 (2 x CH), 114.5 (2 x CH2), 32.7 (2 x CH2), 18.6 (2 x CH3). IR (neat, cm-1): 3018, 2924, 2853, 1612, 1450, 1375, 964, 883. LRMSm/z (%): 162 (15) M+, 147 (25), 106 (20), 81 (100). HRMS calcd for C12H18: 162.1409. Found: 162.1407.

**(3*E,* 7*E*)-9-*t*-butyldimethylsilyloxy-deca-3,7,9-triene-2-one**

To a solution of dienone **3** (500 mg, 3.0 mmol) and NEt3 (0.63 ml, 4.5 mmol) in dry CH2Cl2 (10 ml) at -78C was added *t-*butyldimethylsilyl triflate (0.62 ml, 2.7 mmol) and the resulting mixture was allowed to warm to room temperature. The solution was concentrated onto alumina and chromatographed (alumina II, sequential elution: hexanes, 1% Et2O, 5% Et2O) to give three fractions containing 409 mg of disilylated material, 290 mg of the desired monosilylated compound (52% yield based on recovered starting material, colourless oil) and 170 mg of the dienone **3** (34% recovery) starting material. 1H-NMR (300 MHz, CDCl3): 6.79 (dt, *J* = 15, 6 Hz, 1H), 6.09 (d, *J* = 15 Hz, 1H), 5.96-5.87 (m, 2H), 4.24 (d, *J* = 3.9 Hz, 2H), 2.39-2.22 (m, 4H), 2.24 (s, 3H), 0.96 (s, 9H), 0.17 (s, 6H). 13C-NMR + APT (75 MHz, CDCl3): 198.1 (C), 154.5 (C), 147.0 (CH), 131.5 (CH), 129.1 (CH), 128.8 (CH), 94.5 (CH2), 31.9 (CH2), 30.3 (CH2), 26.6 (CH3), 25.6 (3 x CH3), 18.1 (C), -4.9 (2 x CH3). IR (neat,cm-1): 2930, 2897, 2858, 1699, 1678, 1628, 1593, 1470, 1362, 1319, 1294, 1254, 1024, 1005, 964, 827, 810, 781. LRMS m/z (%): 280 (20) M+, 195 (50), 151 (65), 143 (55), 133 (55), 123 (95), 111 (80), 95 (55), 83 (100). HRMS calcd for C16H28O2Si: 280.1859. Found: 280.1860.

**(3*E*, 7*E*)-2,9-di-*t*-butyldimethylsilyloxydeca-1,3,7,9-tetraene**

1H-NMR (300 MHz, CDCl3):  6.02-5.85 (m, 4H), 4.21 (d, *J* = 3.6 Hz, 4H), 2.22-2.19 (m, 4H), 0.96 (s, 18H), 0.17 (s, 12H). 13C-NMR + APT (75 MHz, CDCl­3): 155.0 (2 x C), 130.6 (2 x CH), 128.4 (2 x CH), 94.1 (2 x CH2), 31.8 (2 x CH2), 25.8 (6 x CH3), 18.3 (2 x C), -4.7 (4 x CH3). IR (neat,cm-1): 2930, 2897, 2856, 1649, 1591, 1472, 1462, 1362, 1327, 1286, 1256, 1165, 1024, 1005, 964, 939, 827, 806, 781, 692. LRMSm/z (%): 394 (5) M+, 379 (14), 337 (75), 263 (90), 205 (30), 147 (60), 125 (35), 73 (100). HRMScalcd for C22H42O2Si2: 394.2723. Found: 394.2722.

**(3*E,* 7*E)*-2-*t*-butyldimethylsilyloxy-9-methyl-deca-1,3,7,9-tetraene (5)**

To a stirred suspension of methyltriphenylphosphonium bromide (535 mg, 1.50 mmol) in dry THF (10 ml) at 0C was added *n-*BuLi (1.5 mmol) and the resulting red mixture was allowed to warm to room temperature. After no visible unreacted phosphonium salt remained the solution was cooled to -78C and was treated with a solution of enone (281 mg, 1.00 mmol) in THF (10 ml, precooled to -78C, added *via* cannula). The resulting reaction was allowed to warm to room temperature and then quenched with water (30 ml) and extracted with Et2O (50 ml). The organic layer was dried over MgSO4, concentrated onto alumina and chromatographed through an alumina column (alumina II, hexanes). Concentration of the relevant fractions gave the product diene **5** as a colourless oil (234 mg, 84% yield). 1H-NMR (300 MHz, CDCl3): 6.16 (d, *J* = 15.6 Hz, 1H), 6.04-5.98 (m, 1H), 5.90 (d, *J* = 15.6 Hz, 1H), 5.65 (mc, 1H), 4.87 (s, 2H), 4.22 (s, 2H), 2.23-2.19 (m, 4H), 1.82 (s, 3H), 0.96 (s, 9H), 0.17 (s, 6H). 13C-NMR + APT (75 MHz, CDCl3): 155.0 (C), 141.9 (C), 133.3 (CH), 130.8 (CH), 129.7 (CH), 128.1(CH), 114.5 (CH2), 94.1 (CH2), 32.4 (CH2), 31.9 (CH2), 25.7 (3 x CH3), 18.6 (CH3), 18.2 (C), -4.7 (2 x CH3). IR (neat,cm-1) = 2924, 2856, 1653, 1593, 1460, 1315, 1254, 1024, 962, 837, 781, 691. LRMS m/z (%): 278 (15) M+, 263 (25), 221 (55), 145 (55), 125 (40), 75 (100). HRMS calcd for C17H30OSi: 278.2066. Found: 278.2065.

**Rac-2-(phenylsulfinyl)-1,4-naphthoquinone (6)**

The sulfinylnaphthoquinone **6** was prepared from 1,4-naphthoquinone **2** using previously described methods (reference [9] main text).

**1,4-Dihydro-1-(5-methyl-hexa-3,5-dienyl)-3-methyl-anthraquinone (7)**

To a solution of the symmetrical double diene **4** (82 mg, 0.505 mmol) in dry CH2Cl2 (1.5 ml) at -15C was added a solution of napthosulfoxide **6** (143 mg, 0.507 mmol) in dry CH2Cl2 (1.5 ml) and the reaction allowed to warm to room temperature overnight. A precipitate formed during this period and was isolated by filtration and identified as the hydroquinone of the napthosulfoxide **9** (41 mg, 29% of starting material). The filtrate was concentrated onto silica-gel (~0.5 g) and chromatographed (sequential elution: hexanes, 5% Et2O in hexanes, 10% Et2O, 20% Et2O). The first eluted fractions were concentrated to give 18 mg of the starting double-diene **4** (22% recovery) while the second set of fractions afforded the mono-Diels-Alder adduct **7** as a yellow oil (46 mg, 29% yield, 37% based on recovered starting material). 1H-NMR (300 MHz, CDCl3):  8.09-8.04 (m, 2H), 7.72-7.66 (m, 2H), 6.09 (d, *J =* 15.3 Hz, 1H), 5.62-5.52 (m, 2H), 4.80 (s, 2H), 3.68 (mc, 1H), 3.23 (dd, *J =* 23.1, 4.5 Hz, 1H), 2.99 (dd, *J =* 23.1, 6.0 Hz, 1H), 2.20-1.99 (m, 2H), 1.85 (s, 3H), 1.85-1.62 (m, 2H), 1.72 (s, 3H). 13C-NMR + APT (75 MHz, CDCl3):  184.5 (C), 184.1 (C), 145.4 (C), 142.6 (C), 141.9 (C), 133.5 (CH), 133.4 (CH), 133.0 (CH), 132.3 (C), 132.0 (C), 130.6 (C), 130.2 (CH), 126.3 (CH), 126.1 (CH), 122.1 (CH), 114.5 (CH2), 35.1 (CH2), 35.0 (CH), 29.6 (CH2), 29.1 (CH2), 22.8 (CH3), 18.5 (CH3). IR (neat,cm-1): 2964, 2924, 2858, 1726, 1661, 1624, 1595, 1450, 1412, 1329, 1292, 964, 912, 881, 733. LRMS m/z (%): 318 (5) M+, 236 (15), 224 (100), 209 (30), 181 (10), 165 (35), 152 (25), 91 (15). HRMS calcd for C22H22O2: 318.1620. Found: 318.1618.

**DA-E-IMDA product 8**

The mono-Diels-Alder adduct **7** (26 mg, 0.082 mmol) was dissolved in dry toluene (2 ml) and the solution degassed by bubbling through a stream of N2. The solution was heated to 160-170C for 5 hours (sealed tube), cooled and concentrated onto silica-gel (~0.5 g) and chromatographed (10% Et2O) to give the double-Diels-Alder adduct **8** as a resinous gum. The material was crystallized by standing in MeOH (1 ml) at 4C (21 mg, 81% yield, mp = 145-7C). 1H-NMR (300 MHz, CDCl3): 8.07-8.00 (m, 1H), 7.98-7.90 (m, 1H), 7.73-7.65 (m, 2H), 5.80 (s, 1H), 5.16 (s, 1H), 3.00 (d, *J =* 17.1 Hz, 1H), 2.89-2.77 (m, 1H), 2.58-2.49 (m, 1H), 2.35-2.16 (m, 2H), 2.06-1.83 (m, 4H), 1.71 (s, 3H), 1.57 (s, 3H), 1.60-1.49 (m, 1H). 13C-NMR + APT (75 MHz, CDCl3): 199.6 (C), 199.2 (C), 134.2 (CH), 133.8 (CH), 133.5 (C), 131.9 (C), 129.9 (C), 129.5 (C), 127.1 (CH), 126.9 (CH), 124.9 (CH), 124.2 (CH), 61.2 (C), 51.3 (C), 40.2 (CH), 40.1 (CH), 40.0 (CH2), 32.5 (CH2), 30.1, (CH2), 25.6 (CH2), 23.8 (CH3), 22.8 (CH3). IR (KBr disc,cm-1): 2871, 1687, 1589, 1429, 1277, 1212, 1157, 1006, 784, 719. LRMSm/z (%): 318 (100) M+, 303 (15), 285 (30), 237 (55), 223 (85), 185 (20), 174 (55), 165 (20), 145 (35), 134 (20), 105 (20), 77 (15). HRMS calcd for C22H22O2: 318.1620. Found: 318.1617.

**2-(phenylsulfinyl)-1,4-naphthalenediol (9)**

­1H-NMR (300 MHz, d6-DMSO):  10.04 (br. s, 1H), 9.93 (br. s, 1H), 8.21-8.04 (m, 2H), 7.72-7.40 (m, 7H), 6.96 (s, 1H). 13C-NMR + APT (75 MHz, d6-DMSO):  147.6 (2 x C), 146.2 (C), 142.8 (C), 130.6 (CH), 129.3 (CH), 126.8 (CH), 126.7 (C), 126.3 (CH), 126.2 (C) 124.2 (CH), 122.5 (CH), 122.4 (CH), 100.3 (CH). LRMS m/z (%): 284 M+ (30), 266 (100), 237 (40), 189 (45), 158 (65), 126 (35), 104 (60), 78 (70). HRMS calcd for C16H12O4S: 284.0507. Found: 284.0509.

**1,4-Dihydro-1-(5-methyl-hexa-3,5-dienyl)-3-(*t*-butyldimethylsilyloxy)-anthraquinone (10)**

To a solution of the naphthosulfoxide **6** (54 mg, 0.19 mmol) in CH2Cl2 (2 ml) at -15C was added double-diene **5** (53 mg, 0.19 mmol) and the resulting reaction mixture was allowed to warm to room temperature and stir for 15 minutes. A precipitate formed during the reaction and was collected by filtration. Spectral analysis of this material identified it as the reduced dienophile **9**. Silica-gel column chromatography of the filtrate (5% Et2O in hexanes) gave the mono-Diels-Alder product **10** as a yellow oil (45 mg, 55% yield). 1H-NMR (300 MHz, d6-acetone): 8.11-8.03 (m, 2H), 7.88-7.82 (m, 2H), 6.15 (d, *J* = 15.6 Hz, 1H), 5.67 (dt, *J* = 15.6, 7.2 Hz), 5.12-5.09 (m, 1H), 4.82 (s, 2H), 3.82 (mc, 1H), 3.23 (mc, 2H), 2.20 (mc, 2H), 1.88-1.79 (m, 2H), 1.73 (s, 3H), 1.03 (s, 9H), 0.30 (s, 3H), 0.29 (s, 3H). 13C-NMR + APT (75 MHz, d6-acetone): 184.2 (2 x C), 148.4 (C), 145.4 (C), 142.6 (C), 142.5 (C), 134.4 (CH), 134.3 (CH), 133.7 (CH), 133.1 (C), 132.8 (C), 131.0 (CH), 126.8 (CH), 126.5 (CH), 114.8 (CH2), 104.7 (CH), 36.3 (CH), 36.2 (CH2), 29.9 (CH2), 29.6 (CH2), 25.9 (3 x CH3), 18.5 (CH3), 18.5 (C), -4.2 (CH3), -4.4 (CH3). IR (neat, cm-1): 2962, 2930, 2856, 1688, 1663, 1595, 1462, 1398, 1362, 1294, 1252, 1209, 1163, 964, 893, 839, 781.LRMS m/z (%)**:** 434 (15) M+, 377 (85), 339 (100), 295 (20), 281 (30), 73 (99). HRMS calcd for C27H34O3Si: 434.2277. Found: 434.2278.

**DA-E-IMDA product 11**

The mono-Diels-Alder adduct **10** (38 mg, 0.087 mmol) was dissolved in degassed toluene (10 ml) and heated to 160C for 6 hours. The reaction was then cooled and concentrated onto alumina (activated with 1.2% water) and chromatographed (5% Et2O in hexanes) to give the product **11** as a resinous material that solidified on standing in the freezer (27 mg, 71% yield, mp = 114-116C). 1H-NMR (300 MHz, CDCl3): 8.09-8.04 (m, 1H), 7.98-7.92 (m, 1H), 7.72-7.66 (m, 2H), 5.80 (s, 1H), 4.66 (mc, 1H), 3.09 (d, *J =* 17.5 Hz, 1H), 2.98-2.85 (m, 1H), 2.67-2.60 (m, 1H), 2.32-1.85 (m, 7H), 1.56 (s, 3H), 0.92 (s, 9H), 0.19 (s, 3H), 0.13 (s, 3H). 13C-NMR + APT (75 MHz, CDCl3): 199.4 (C), 199.3 (C), 146.7 (C), 134.2 (CH), 133.8 (CH), 133.4 (C), 131.8 (C), 129.3 (C), 127.2 (CH), 126.9 (CH), 124.4 (CH), 108.8 (CH), 61.2 (C), 52.0 (C), 40.0 (CH), 39.9 (CH2), 39.4 (CH), 32.5 (CH2), 30.7 (CH2), 25.7 (CH2), 25.7 (3 x CH3), 22.8 (CH3), 18.0 (C), -4.3 (CH3), -4.4 (CH3). IR (KBr disc,cm-1): 2927, 2855, 1692, 1666, 1590, 1472, 1434, 1350, 1275, 1253, 1214, 1194, 915, 853, 835, 776. LRMS m/z (%): 434 (100) M+, 419 (15), 391 (15), 377 (40), 359 (10), 340 (25), 261 (35), 174 (25), 73 (95). HRMS calcd for C27H34O3Si: 434.2277. Found: 434.2280.

**6-bromo-2,4-dimethoxy-3-methylphenol (12)**

The bromide **12** was prepared using previously described methods (reference [11] main text).

**(*S*)S-2,4-dimethoxy-3-methyl-6-*p*-tolylsulfinylphenol** **(14)**

To a solution of bromide **12** (150 mg, 0.61 mmol) in dry THF (2 ml) at -78C was added *n*-BuLi (1.34 mmol) and the reaction allowed to warm to room temperature. After stirring for 15 minutes the solution was re-cooled to -78C and menthyl sulfinate **13** (214 mg, 0.73 mmol) was added. The reaction was allowed to warm to room temperature and water (20 ml) and Et2O (10 ml) were added. The aqueous layer was acidified with NH4Cl and extracted with EtOAc (2 x 20 ml). The combined organic layers were washed with brine (20 ml), dried over MgSO4 and the solvent removed under reduced pressure. Flash chromatography of the residue (silica-gel, sequential elution: 2% Et2O in CH2Cl2, 5%) gave the sulfoxide **14** as a white solid (99 mg, 53% yield), mp = 188-90C, D = -13 (c = 0.17, CHCl3). 1H-NMR (300 MHz, CDCl3): 8.78 (br. s, 1H), 7.60 (d, *J =* 8.4 Hz, 2H), 7.28 (d, *J =* 8.4 Hz, 2H), 6.58 (s, 1H), 3.81 (s, 3H), 3.77 (s, 3H), 2.38 (s, 3H), 2.13 (s, 3H). 13C-NMR + APT (75 MHz, CDCl3): 151.5 (C), 147.5 (C), 144.6 (C), 141.9 (C), 141.1 (C), 130.0 (2 x CH), 125.1 (2 x CH), 124.7 (C), 122.0 (C), 101.1 (CH), 60.5 (CH3), 56.0 (CH3), 21.4 (CH3), 9.4 (CH3). IR (KBr disc,cm-1) = 2930, 2833, 2711, 2607, 1458, 1410, 1366, 1284, 1247, 1185, 1120, 1084, 1001, 808, 748. LRMSm/z (%): 306 (100) M+, 289 (90), 274 (30), 258 (50), 243 (20), 214 (30), 183 (25), 91 (25). HRMS calcd for C16H18O4S: 306.0926. Found: 306.0923.

The racemic sulfoxide was prepared by substituting the menthyl sulfinate **13** with the corresponding ethyl sulfinate (51% yield).

**2-methyl-3-methoxy-5-(*p*-tolylsulfinyl)-1,4-benzoquinone (15)**

To a stirred suspension of phenol **14** (313 mg, 1.02 mmol) in acetonitrile (12 ml) was added a solution of ceric ammonium nitrate (1.17 g, 2.13 mmol) in water (5 ml). The resulting orange mixture was stirred until a homogeneous solution was obtained (approximately 15 minutes). The acetonitrile was removed under vacuum and the residue diluted with DCM (30 ml) and water (30 ml). The organic layer was separated and the aqueous layer washed with DCM (2 x 20 ml). The combined organic layers were dried over MgSO4­ and concentrated to afford the sulfinylquinone as a low melting orange oil (267 mg, 90% yield), D = +258 (c = 0.35, CHCl3), literature value: D = +253 (c = 0.35, CHCl3) (reference [5g] main text]. This reaction was also conducted in the racemic series.

**5,8-dihydro-5-(5-methyl-hexa-3,5-dienyl)-3-methoxy-2-methyl-7-(*t*-butyldimethylsilyloxy)-1,4-naphthoquinone (16)**

To a solution of the double-diene **5** (59 mg, 0.212 mmol) in dry CH2Cl2 (1 ml) at -15C was added a solution of the sulfinyl quinone **15** (62 mg, 0.214 mmol) in dry CH2Cl2 (1 ml) and the resulting reaction mixture was allowed to warm to room temperature. The solution was then concentrated onto SiO2 and chromatographed (10% Et2O) to give the mono-Diels-Alder adduct **16** as a yellow oil (46 mg, 51% yield). 1H-NMR (300 MHz, d6-acetone): 6.12 (d, *J* = 15.6 Hz, 1H), 5.63 (dt, *J* = 15.6, 6.9 Hz, 1H), 5.01 (d, *J* = 4.5 Hz, 1H), 4.82 (d, *J* = 5.4 Hz, 2H), 3.97 (s, 3H), 3.59 (mc, 1H), 3.01 (d, *J* = 6.3 Hz, 2H), 2.16-2.05 (m, 2H), 1.87 (s, 3H), 1.79-1.64 (m, 2H), 1.77 (s, 3H), 0.97 (s, 9H), 0.23 (s, 3H), 0.22 (s, 3H). 13C-NMR + APT (75 MHz, d6-acetone): 187.7 (C), 183.0 (C), 156.5 (C), 148.5 (C), 142.6 (C), 141.3 (C), 139.7 (C), 133.8 (CH), 131.1 (CH), 128.6 (C), 114.8 (CH2), 104.9 (CH), 61.0 (CH3), 35.9 (CH2), 35.7 (CH), 29.7 (CH2), 29.5 (CH2), 25.9 (3 x CH3), 18.6 (CH3), 18.5 (C), 8.5 (CH3), -4.3 (CH3), -4.4 (CH3). IR (neat,cm-1): 2953, 2930, 2856, 1688, 1655, 1616, 1460, 1447, 1306, 1258, 1205, 1180, 962, 903, 839, 779. LRMS m/z (%): 428 (10) M+, 371 (90), 346 (15), 333 (80), 319 (20), 305 (25), 289 (30), 275 (20), 233 (20), 73 (100). HRMScalcd for C25H36O­4Si: 428.2383. Found: 428.2383.

This reaction was also conducted in the racemic series.

DA-E-IMDA product 17

The mono-Diels-Alder adduct **16** (33 mg, 0.077 mmol) was dissolved in dry, deoxygenated toluene (10 ml) in a sealed tube. After heating to 160C for six hours the solution was cooled, evaporated onto alumina and chromatographed (alumina II, 5% Et2O in hexanes) to afford the double Diels-Alder adduct **17** as a resin that crystallized on standing in MeOH at 4C (30 mg, 91% yield, mp = 120-2C), D = -324 (c = 0.425, CHCl3) (for 96:4 er, see Fig. B). 1H-NMR (300 MHz, CDCl3): 5.72 (s, 1H), 4.67 (t, *J* = 2 Hz, 1H), 3.87 (s, 3H), 2.99 (d, *J* = 17 Hz, 1H), 2.88-2.73 (m, 2H), 2.14-1.82 (m, 7H), 1.86 (s, 3H), 1.57 (s, 3H), 0.92 (s, 9H), 0.15 (s, 3H), 0.11 (s, 3H). 13C-NMR + APT (75 MHz, CDCl3): 200.1 (C), 197.0 (C), 157.8 (C), 146.9 (C), 129.5 (C), 126.6 (C), 123.4 (CH), 108.3 (CH), 60.9 (C), 59.2 (CH3), 52.3 (C), 41.0 (CH2), 39.9 (CH), 39.3 (CH), 32.7 (CH2), 30.6 (CH2), 25.7 (3 x CH3), 25.4 (CH2), 22.7 (CH3), 18.0 (C), 9.2 (CH3), -4.2 (CH3), -4.4 (CH3). IR (KBr disc,cm-1): 2931, 2856, 1698, 1662, 1615, 1363, 1312, 1288, 1252, 1184, 1118, 836. LRMSm/z (%): 428 (100) M+, 413 (25), 396 (30), 371 (40), 353 (25), 314 (20), 256 (20), 73 (85). HRMScalcd for C25H36O4Si: 428.2383. Found = 428.2384.

This reaction was also conducted in the racemic series.

See Fig. A for X-ray crystal structure of **17** (crystal from racemic series) and Fig. B for chiral stationary phase HPLC on *rac-***17** and (-)-**17**.


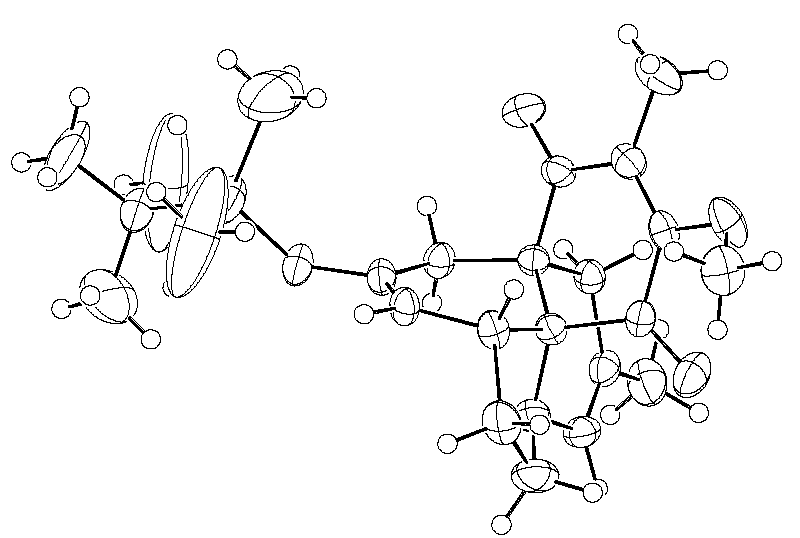


**Figure A:** Anisotropic displacement ellipsoid plot for **17** (multi-site disorder in TBS group) and stick-diagram of perspective.

Unit cell: *a* = 7.82030 (10), *b* = 25.1258 (3), *c* = 12.4625 (2) Ǻ, = 92.8517 (5)°, *V* = 2445.74 (6) Å3, T = 200 K, space group *P*21/*n*


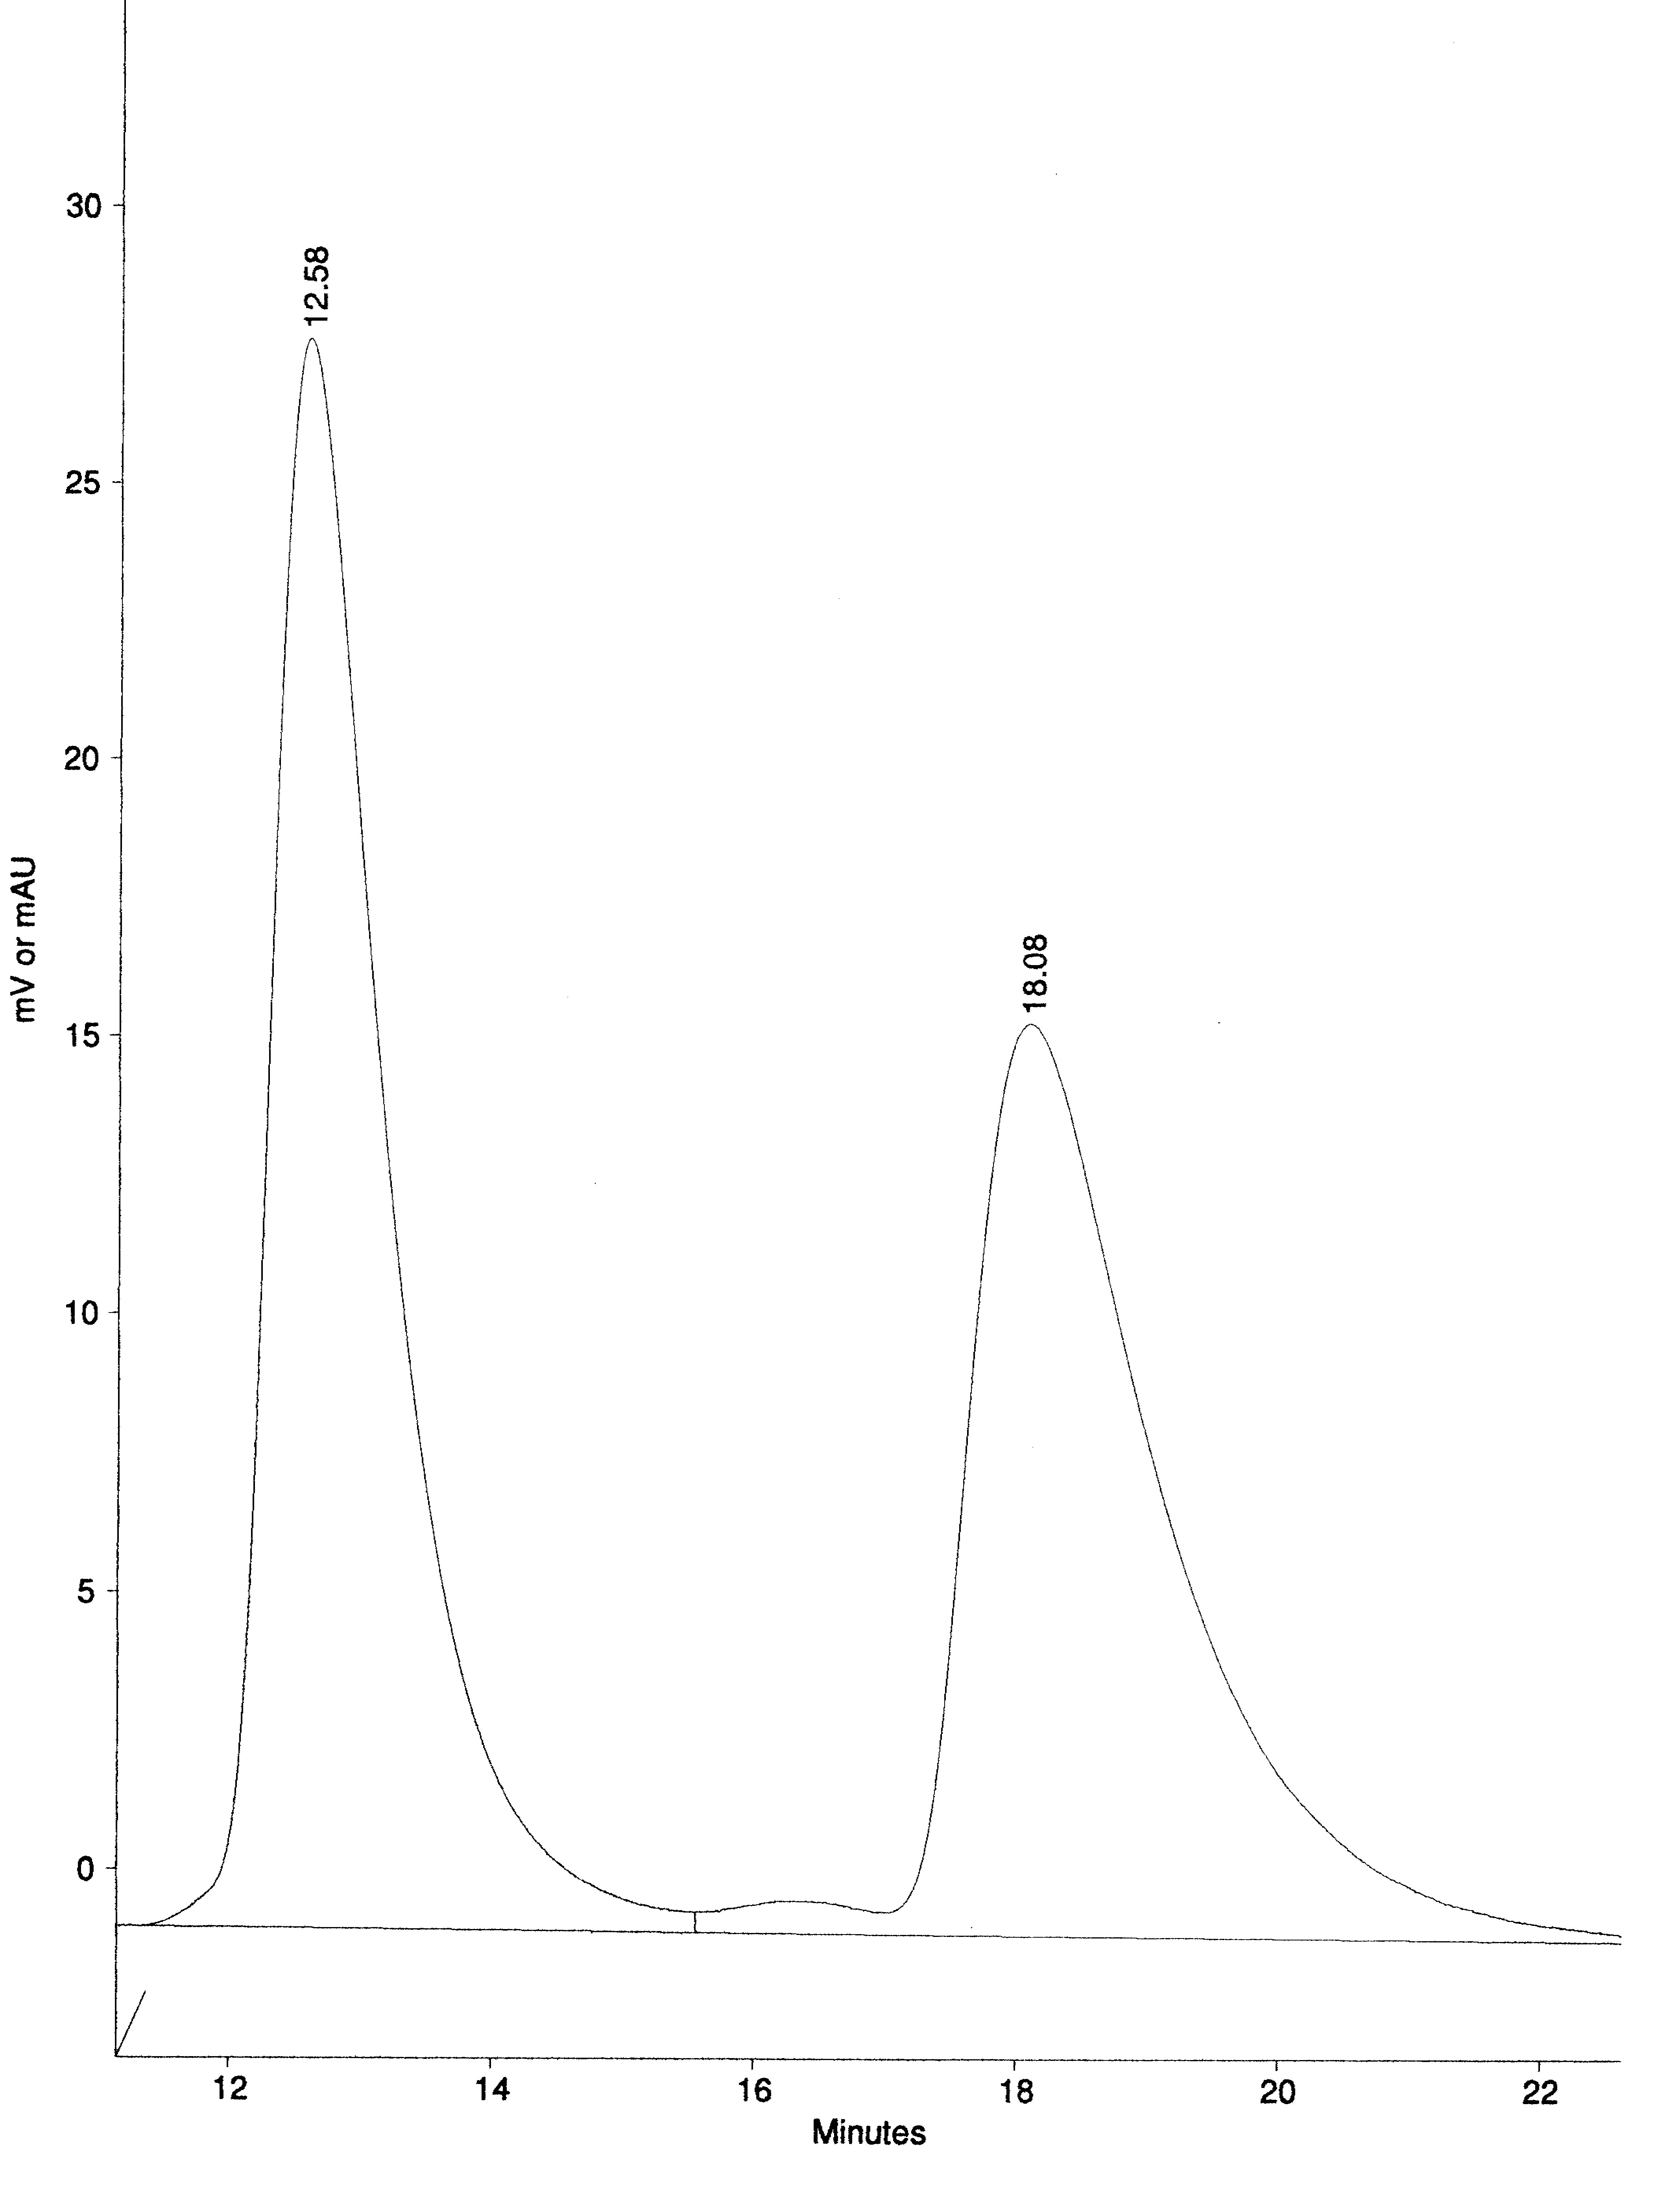


*rac-***17**


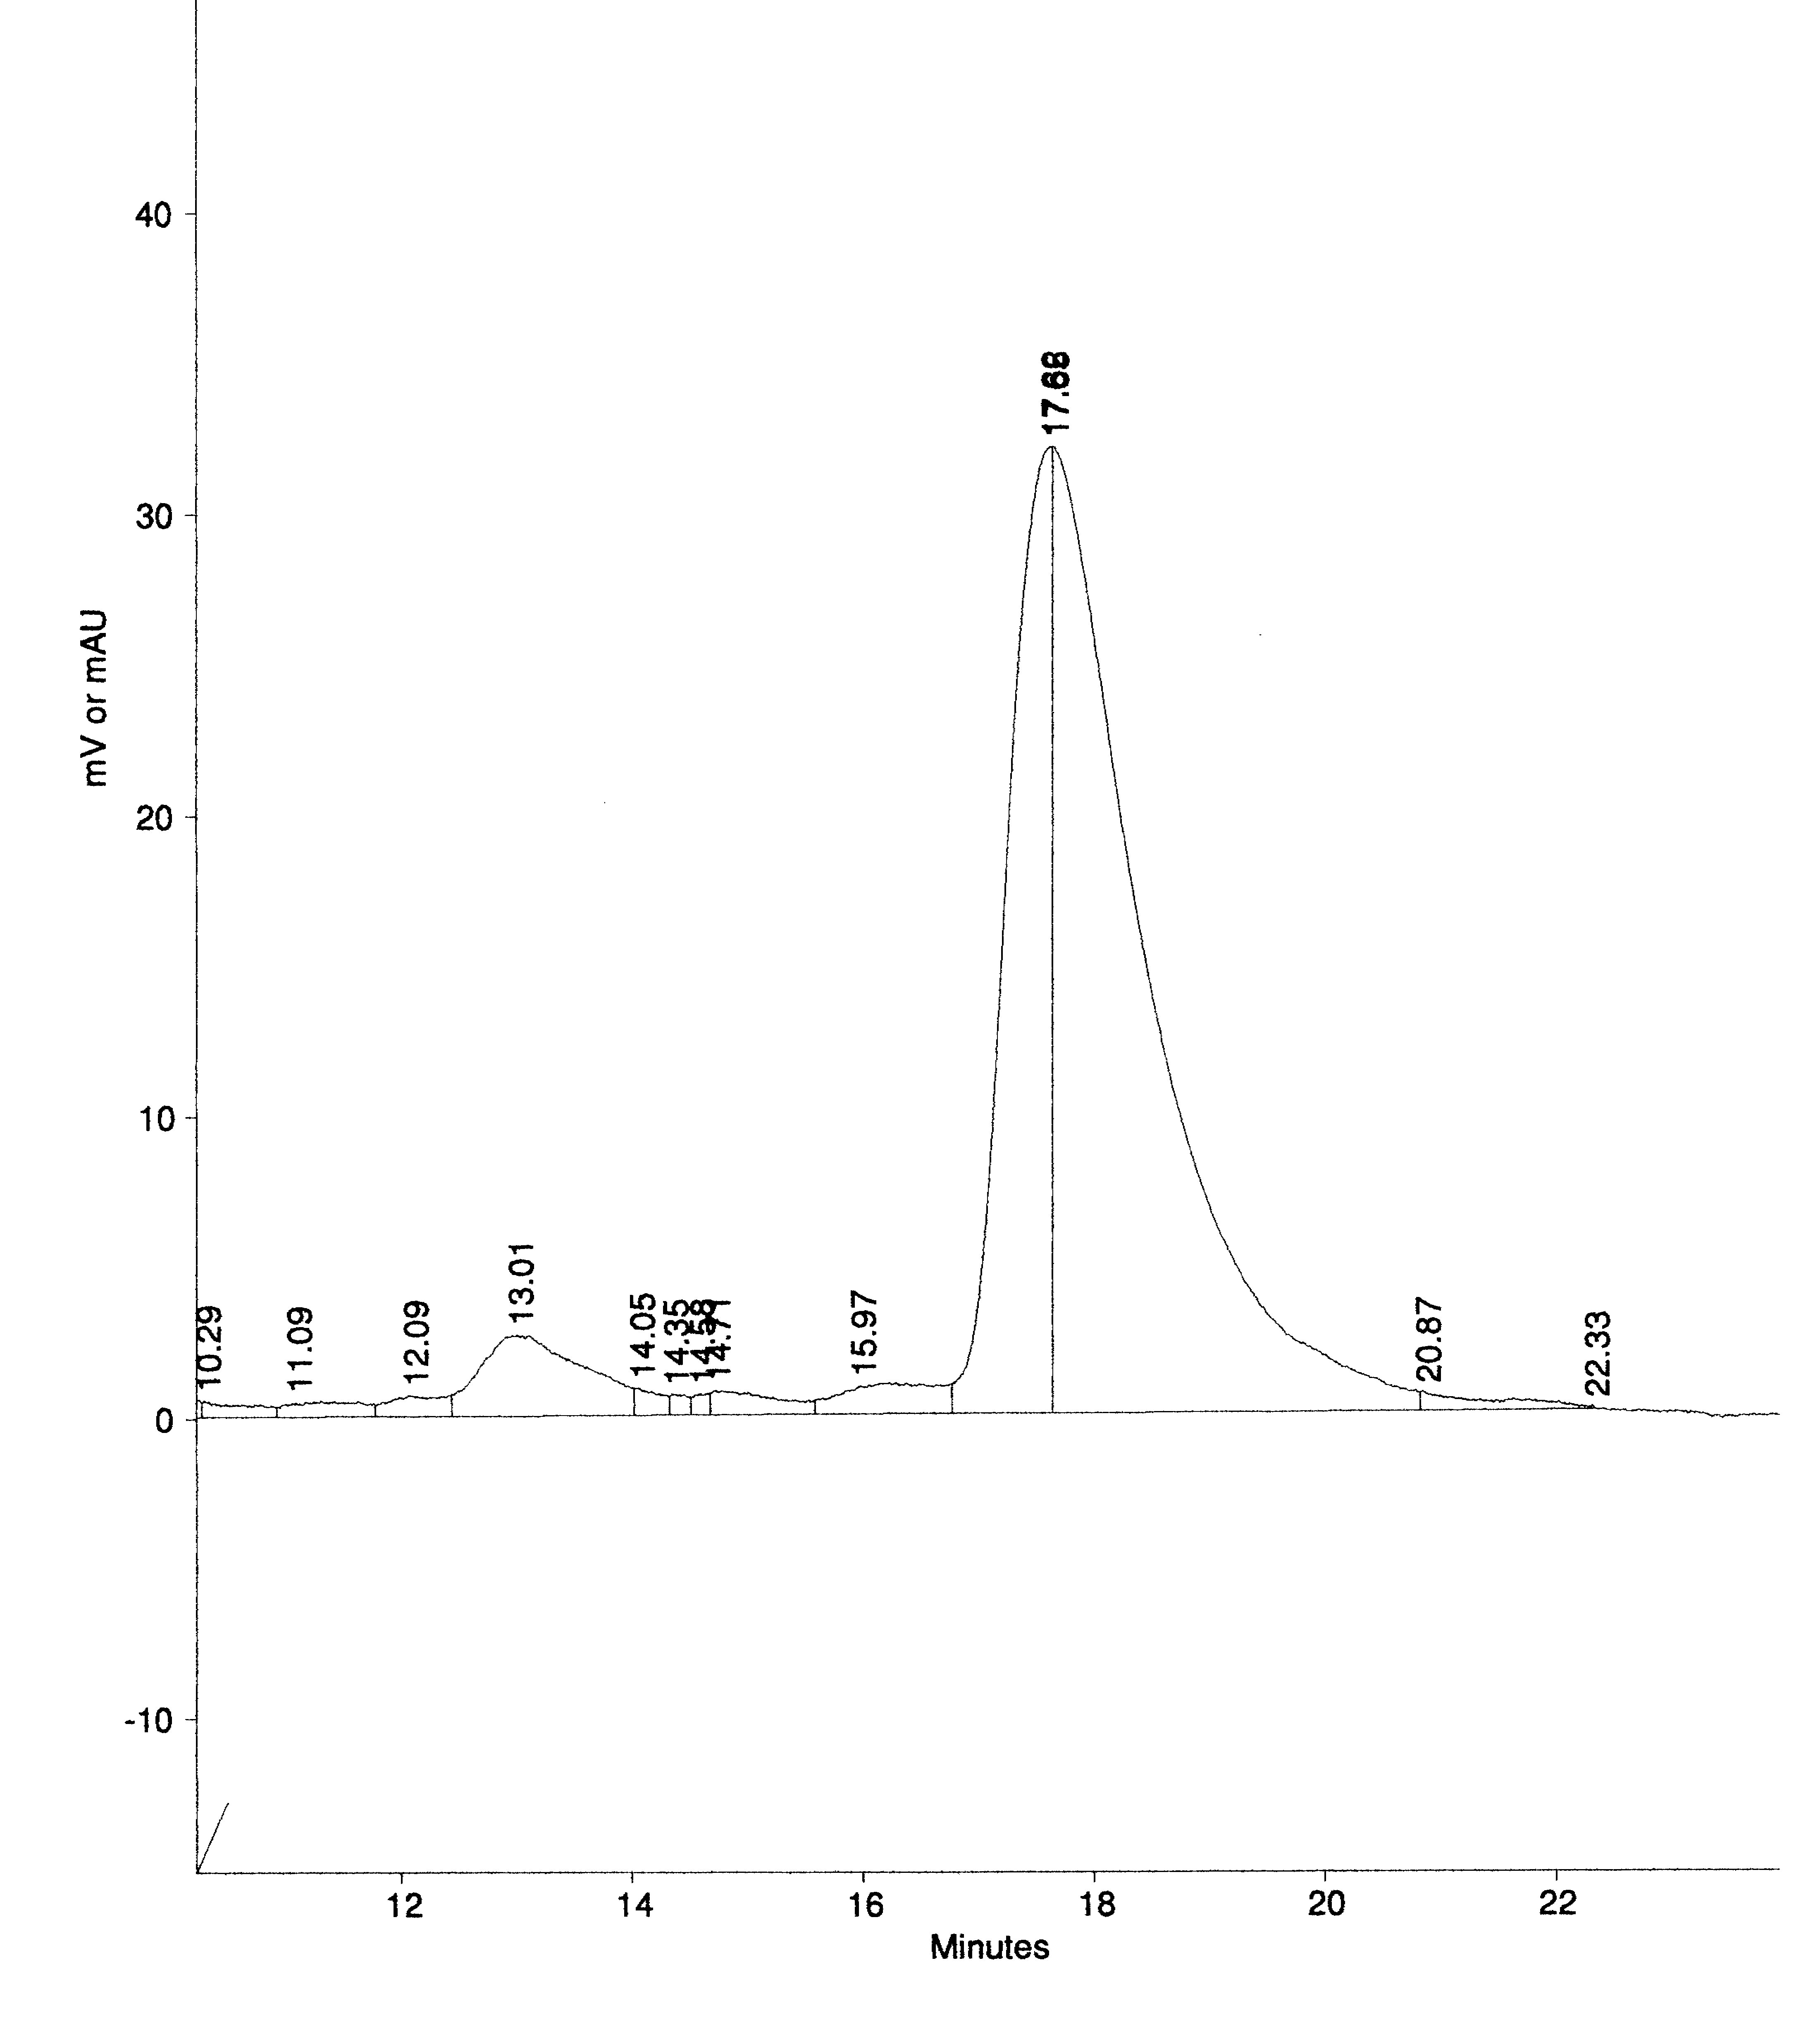


(-)-**17**

**Figure B**: HPLC traces of *rac-***17** and enantiomerically enriched (-)-**17**, using a Chiracel OD column (25 x 0.49 cm) eluting with hexane using UV detection (254 nm).
